# Supplementary material
Source: PubMed Central journal article supplement (PMC2875362)
Supplement: NIHMS141944-supplement-Suppl_Materials.pdf [file NIHMS141944-supplement-Suppl_Materials.pdf]

**Web supplementary materials for**  
**“Semiparametric regression in size-biased sampling” by Chen**

## 1. An illustrative example of invariance property

To better understand the invariance property, consider the example when  $\xi$  are standard Exponential,  $\beta = -\log 2$ , and  $Z = 0/1$  in the model

$$-\log X = \beta Z + \varepsilon. \quad (1)$$

In Figure 1, we plot  $f(x | Z)$  and  $F(x | Z)$ , and their respective size-biased  $f(x | Z, S = 1)$  and  $F(x | Z, S = 1)$ .

As shown in the figures, the size-biased  $f(x | Z, S = 1)$  appears very different from  $f(x | Z)$ . But the shapes of  $F(x | Z)$  and  $F(x | Z, S = 1)$  remain similar, except for an apparent scale-change along the horizontal axis. This reflects the fact that the size-biased sampling can alter individual distribution functions, but not the relative comparison measured by the regression parameter  $\beta$  in model (1).

## 2. A variance calculation algorithm

In actual numerical studies, a less computer-intensive sample-based method can be used to directly estimate the variance of  $n^{1/2}(\hat{\beta}_n - \beta_0)$ , as recommended in [Kalbfleisch and Prentice \(2002, p. 238\)](#).

That is, first use a recursive bisection algorithm to solve for  $b_j$  in

$$n^{1/2}U_n(b_j) = v_j,$$

$j = 1, 2, \dots, p$ , where  $v_j$  are the  $p$ -vectors such that  $v = (v_1, v_2, \dots, v_p)^T$  and  $v^{\otimes 2} = \hat{V}$ . Then a consistent variance estimator of  $n^{1/2}(\hat{\beta}_n - \beta_0)$  is given by  $(b_1 - \hat{\beta}_n, b_2 - \hat{\beta}_n, \dots, b_p - \hat{\beta}_n)^{\otimes 2}$ . Our finite-sample simulation shows that this method generally performs well. Details on more justification of this method can be found in [Chen and Jewell \(2000\)](#).

Figure 1: Plots of density and distribution functions under model (1) of  $\log X = -\beta^T Z + \varepsilon$ , where  $\beta = -\log 2$ ,  $Z = 0/1$  and  $\xi = \exp(\varepsilon) \sim \text{Exponential}(1)$ : (a) density functions  $f(x|Z)$ ; (b) size-biased density functions  $f(x|Z, S = 1)$ ; (c) distribution functions  $F(x|Z)$ ; (d) size-biased distribution functions  $F(x|Z, S = 1)$ .

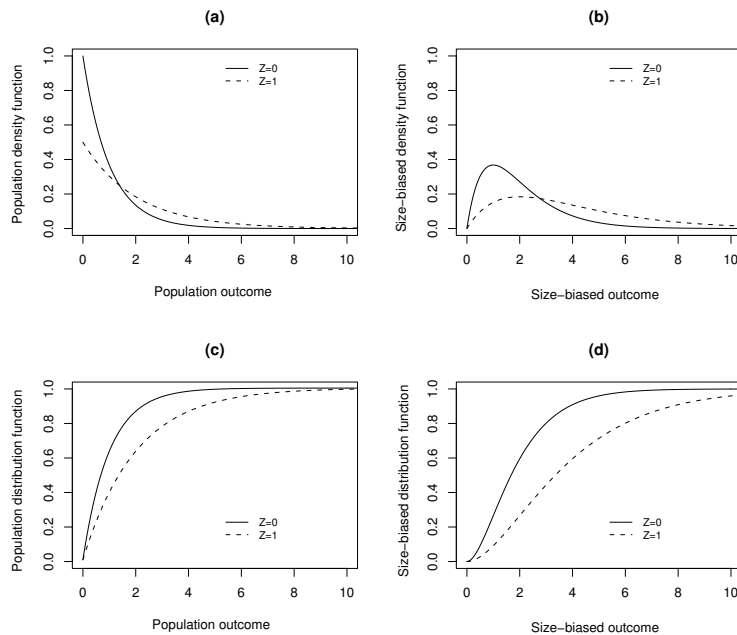

### 3. Proof of Theorem 2

We assume the following regularity conditions similar to those in [Ying \(1993\)](#):

1. The covariates are uniformly bounded.
2. The parameter space  $\mathcal{B}$  of  $\beta$  is compact.
3. The density function of  $f_\eta(\cdot)$  and its derivative  $f'_\eta(\cdot)$  are bounded, and satisfying that

$$\int_0^y \left\{ \frac{f'_\eta(y)}{f_\eta(y)} \right\}^2 f_\eta(y) dy < \infty.$$

Denote  $\mathcal{R}_n(y) = \mathcal{E}^{(2)}(y) - \mathcal{E}^{(1)}(y)^{\otimes 2} / \mathcal{E}^{(0)}(y)$ . Let  $D_n = \int_0^\infty \lambda'_\eta(y) / \lambda_\eta(y) \mathcal{R}_n(y) f_\eta(y) dy$ , and  $V_n = \int_0^\infty \mathcal{R}_n(y) f_\eta(y) dy$ . Since

$$\mathcal{R}_n(y) = n^{-1} \sum_{i=1}^n \left\{ Z_i - \frac{\sum_j Z_j \bar{F}_j(y e^{-\beta^\top Z_j})}{\sum_j Z_j \bar{F}_j(y e^{-\beta^\top Z_j})} \right\}^{\otimes 2} \bar{F}_i(y e^{-\beta^\top Z_i}) \geq 0,$$

where  $\bar{F}_i(y) = 1 - F_i(y) = 1 - F(y | Z_i)$ , we know that  $\mathcal{R}_n(y)$  is nonnegative-definite. In addition, for  $y_1 \leq y_2$ ,

$$\begin{aligned} \mathcal{R}_n(y_1) &\geq n^{-1} \sum_{i=1}^n \left\{ Z_i - \frac{\sum_j Z_j \bar{F}_j(y_1 e^{-\beta^\top Z_j})}{\sum_j Z_j \bar{F}_j(y_1 e^{-\beta^\top Z_j})} \right\}^{\otimes 2} \bar{F}_i(y_2 e^{-\beta^\top Z_i}) \\ &\geq n^{-1} \sum_{i=1}^n \left\{ Z_i - \frac{\sum_j Z_j \bar{F}_j(y_2 e^{-\beta^\top Z_j})}{\sum_j Z_j \bar{F}_j(y_2 e^{-\beta^\top Z_j})} \right\}^{\otimes 2} \bar{F}_i(y_2 e^{-\beta^\top Z_i}) = \mathcal{R}_n(y_2). \end{aligned}$$

We hence know that  $\mathcal{R}_n(y)$  is non-increasing. Since

$$D_n = \int_0^\infty \mathcal{R}_n(y) \left\{ f'_\eta(y) + \frac{f_\eta^2(y)}{\bar{F}_\eta(y)} \right\} dy = \int_0^\infty \mathcal{R}_n(y) \frac{f_\eta^2(y)}{\bar{F}_\eta(y)} dy + \int_0^\infty f(y) d\{-\mathcal{R}_n(y)\},$$

$D_n$  are also nonnegative-definite. By Theorem 1 in [Ying \(1993\)](#),  $U_n(\beta)$  is thus asymptotically linear such that

$$\sup_{\|\beta - \beta_0\| \leq d_n} \left\{ \frac{\|U_n(\beta) - U_n(\beta_0) - D_n n(\beta - \beta_0)\|}{n^{1/2} + n\|\beta - \beta_0\|} \right\} = o_p(1),$$

as  $d_n > 0$  and  $d_n \rightarrow_p 0$ .

Assume that all the eigenvalues of  $D_n$  are bounded away from zero for sufficiently large  $n$ . Then the eigenvalues of  $V_n$  would be eventually bounded away from zero as well. According to Corollary 1 in [Ying \(1993\)](#), there exists a closed neighborhood containing  $\beta_0$  as an interior point such that  $\hat{\beta}_n$  is strongly consistent, and  $n^{1/2} V_n^{-1/2} D_n (\hat{\beta}_n - \beta_0) \rightarrow_{\mathcal{D}} N(0, I_{p \times p})$ . In addition, since  $\lim_{n \rightarrow \infty} \mathcal{E}^{(2)}(y; \beta) = e^{(k)}(y; \beta)$ ,  $k = 0, 1, 2$ , we further have  $D_n \rightarrow_p D$  and  $V_n \rightarrow_p V$ . As a result, we have

$$n^{1/2} (\hat{\beta}_n - \beta_0) \rightarrow_{\mathcal{D}} \mathcal{N}\{0, D^{-1} V (D^{-1})^\top\}$$

as the asymptotic properties stated in Theorem 2.

For the weighted estimating equations  $U_n^w(\beta)$ , in addition to the regularity conditions for Theorem 2, we further assume that  $w_n(y; \beta)$  are left-continuous in  $y$  and  $\sigma\{N_i(ue^{-\beta_0^T Z_i}), Z_i, u \leq y, i = 1, 2, \dots, n\}$ -measurable, as well as

1.  $\limsup_n \sup_{\|\beta\| \leq b} \{|w_n(0; \beta)| + \int_0^\infty |dw_n(y; \beta)|\} < \infty$  a.s., for any  $b > 0$ .
2.  $\sup_{y \leq y_0, \|\beta - \beta_0\| \leq n^{-1/3}} |w_n(y; \beta) - w_n(y; \beta_0) - \delta_w(y; \beta_0)^T(\beta - \beta_0)| = o(n^{-1/2})$  a.s., for some  $y_0 > 0, \delta_0 > 0$  and  $\delta_w(y; \beta)$  such that  $\int_0^{y_0} |d\delta_w(y)| = o(n^{1/3 - \delta_0})$ .

Thus, the weighted estimating functions are also asymptotically linear such that

$$\sup_{\|\beta - \beta_0\| \leq d_n} \left\{ \frac{\|U_n^w(\beta) - U_n^w(\beta_0) - D_{w,n}n(\beta - \beta_0)\|}{n^{1/2} + n\|\beta - \beta_0\|} \right\} = o_p(1)$$

as  $d_n \rightarrow_p 0$ , where  $D_{w,n} = \int_0^\infty w(y; \beta) dD_n(y; \beta) \rightarrow D_w$ . Assume that all the eigenvalues of  $D_{w,n}$  are bounded away from 0. Then according to Corollary 2 in Ying (1993),  $\widehat{\beta}_n^w$  is strongly consistent, and

$$n^{1/2}(\widehat{\beta}_n^w - \widehat{\beta}_0) \rightarrow_{\mathcal{D}} \mathcal{N}\{0, D_w^{-1}V_w(D_w^{-1})^T\}.$$

It is straightforward to verify that the Gehan-type of weight functions satisfy the above-mentioned regularity conditions.

## References

- Chen, Y. Q. and Jewell, N. P. (2001). On a general class of hazards regression models. *Biometrika* **88**, 687-702.
- Kalbfleisch, J. D. and Prentice, R. L. (2002). *The Statistical Analysis of Failure Time Data, 2nd Ed.*. New York: Wiley.
- Ying, Z. (1993). A large sample study of rank estimation for censored regression data. *Annals of Statistics*, **21** 76-99.
